# Supplementary material for: The Tec kinase ITK is essential for ILC2 survival and epithelial integrity in the intestine
Source: PubMed Central journal article supplement (PMC6377622; doi:10.1038/s41467-019-08699-9), 2019-02-15

# Supplementary Figure 7

A

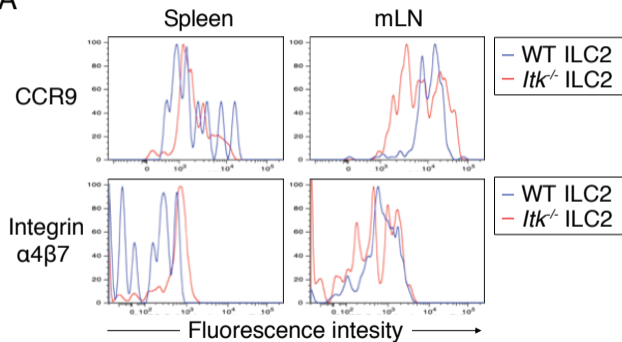

B

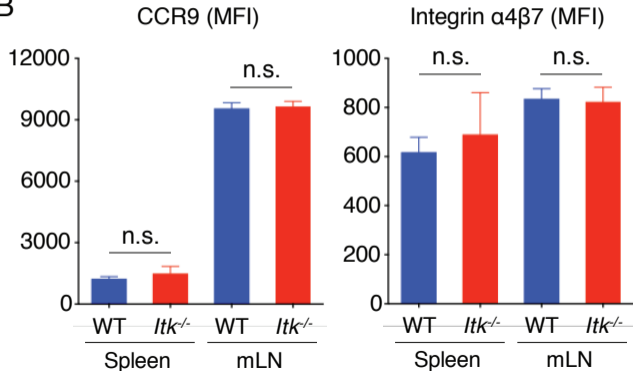

Supplement: 41467_2019_8699_MOESM8_ESM.pdf [file 41467_2019_8699_MOESM8_ESM.pdf]
